# Supplementary material
Source: PubMed Central journal article supplement (PMC3250558)
Supplement: NIHMS310127-supplement-02.pdf [file NIHMS310127-supplement-02.pdf]

**Table 5: Association of Clinical Measures and Participant Age with Change in Amblyopic Eye Visual Acuity**

|                                                                          | Cause of Amblyopia                                 |      |                      |      |                                                           |      |                      |      |
|--------------------------------------------------------------------------|----------------------------------------------------|------|----------------------|------|-----------------------------------------------------------|------|----------------------|------|
|                                                                          | Combined Change in Amblyopic Acuity (logMAR lines) |      |                      |      | Strabismus Only Change in Amblyopic Acuity (logMAR lines) |      |                      |      |
|                                                                          | Baseline to 9 Weeks                                |      | Baseline to 18 Weeks |      | Baseline to 9 Weeks                                       |      | Baseline to 18 Weeks |      |
|                                                                          | n                                                  | Mean | n                    | Mean | n                                                         | Mean | n                    | Mean |
| <b>Ocular Alignment at Baseline (minimum angle at distance and near)</b> |                                                    |      |                      |      |                                                           |      |                      |      |
| Orthotropia (0 Δ)                                                        | 22                                                 | 1.3  | 21                   | 2.3  | 11                                                        | 2.2  | 11                   | 3.4  |
| Microtropia (1 to 8 Δ)                                                   | 45                                                 | 1.8  | 43                   | 2.6  | 14                                                        | 2.6  | 14                   | 3.3  |
| Heterotropia (>8 Δ)                                                      | 19                                                 | 1.3  | 22                   | 1.9  | 17                                                        | 2.5  | 18                   | 3.0  |
| Adjusted P-Value*                                                        | 0.88                                               |      |                      |      | 0.53                                                      |      |                      |      |
| <b>Baseline Amblyopic Acuity</b>                                         |                                                    |      |                      |      |                                                           |      |                      |      |
| 20/125 - 20/400                                                          | 19                                                 | 1.6  | 22                   | 2.3  | 14                                                        | 3.4  | 14                   | 3.9  |
| 20/80 - 20/100                                                           | 31                                                 | 1.5  | 30                   | 2.7  | 9                                                         | 1.9  | 10                   | 3.3  |
| 20/40 - 20/63                                                            | 36                                                 | 1.5  | 34                   | 2.1  | 19                                                        | 2.1  | 19                   | 2.6  |
| Adjusted P-Value*                                                        | 0.34                                               |      |                      |      | 0.002                                                     |      |                      |      |
| <b>Amblyopic Spherical Equivalent</b>                                    |                                                    |      |                      |      |                                                           |      |                      |      |
| <3.5 D                                                                   | 19                                                 | 1.5  | 17                   | 2.0  | 22                                                        | 1.9  | 22                   | 2.7  |
| 3.5 - <5 D                                                               | 33                                                 | 1.6  | 31                   | 2.2  | 11                                                        | 3.1  | 9                    | 3.6  |
| ≥5 D                                                                     | 34                                                 | 1.5  | 38                   | 2.6  | 9                                                         | 3.2  | 12                   | 3.8  |
| Adjusted P-Value*                                                        | 0.07                                               |      |                      |      | 0.43                                                      |      |                      |      |
| <b>Max J0 and J45**</b>                                                  |                                                    |      |                      |      |                                                           |      |                      |      |
| <0.75 D                                                                  | 70                                                 | 1.4  | 67                   | 2.2  | 37                                                        | 2.7  | 36                   | 3.3  |
| ≥0.75 D                                                                  | 16                                                 | 1.9  | 19                   | 2.7  | 5                                                         | 0.8  | 7                    | 2.9  |
| Adjusted P-Value*                                                        | 0.32                                               |      |                      |      | 0.11                                                      |      |                      |      |
| <b>Age (years)</b>                                                       |                                                    |      |                      |      |                                                           |      |                      |      |
| 3 - <5                                                                   | 46                                                 | 1.3  | 47                   | 2.2  | 27                                                        | 2.6  | 26                   | 3.2  |
| 5 - <7                                                                   | 40                                                 | 1.8  | 39                   | 2.6  | 15                                                        | 2.3  | 17                   | 3.2  |
| Adjusted P-Value*                                                        | 0.83                                               |      |                      |      | 0.54                                                      |      |                      |      |

|                                                                        |    |       |    |     |    |      |    |     |  |
|------------------------------------------------------------------------|----|-------|----|-----|----|------|----|-----|--|
| <b>Vector Dioptric Difference</b>                                      |    |       |    |     |    |      |    |     |  |
| <0.35 D                                                                | 0  | —     | 0  | —   | 12 | 2.6  | 11 | 2.7 |  |
| 0.35 - <0.71 D                                                         | 0  | —     | 0  | —   | 10 | 1.6  | 11 | 3.6 |  |
| 0.71 - <1.41 D                                                         | 3  | 1.7   | 2  | 1.0 | 20 | 2.9  | 21 | 3.2 |  |
| 1.41- <2.12 D                                                          | 26 | 2.2   | 26 | 2.8 | 0  | —    | 0  | —   |  |
| 2.12 - <2.83 D                                                         | 14 | 1.8   | 15 | 2.3 | 0  | —    | 0  | —   |  |
| ≥2.83 D                                                                | 43 | 1.1   | 43 | 2.1 | 0  | —    | 0  | —   |  |
| Adjusted P-Value*                                                      |    | 0.17  |    |     |    | 0.69 |    |     |  |
| <b>Stereoacuity at Baseline in Seconds of Arc (log transformation)</b> |    |       |    |     |    |      |    |     |  |
| 40 (1.60) - 800 (2.90)                                                 | 22 | 2.0   | 21 | 3.6 | 8  | 3.4  | 8  | 3.4 |  |
| 3000 (3.48)                                                            | 17 | 1.9   | 15 | 2.4 | 5  | 3.2  | 5  | 4.0 |  |
| >3000 (4.00)                                                           | 36 | 1.2   | 39 | 1.9 | 24 | 2.1  | 24 | 2.9 |  |
| Uninterpretable/Failed Pretest                                         | 11 | 1.0   | 11 | 1.3 | 5  | 2.2  | 6  | 3.3 |  |
| Adjusted P-Value*                                                      |    | 0.002 |    |     |    | 0.03 |    |     |  |

\*From a longitudinal linear regression of visual acuity at 9 and 18 weeks including: ocular alignment at baseline, baseline amblyopic eye visual acuity, amblyopic eye spherical equivalent, maximum of the vertical (J0) or oblique (J45) Jackson cross cylinder, age, vector dioptric difference and stereoacuity at baseline. All factors as continuous (except baseline stereoacuity and baseline scored ocular alignment).

\*\* Maximum of J0 and J45 in the amblyopic eye is calculated as the maximum absolute value of J0 or absolute value of J45 [ $\max(\text{abs}(J0_{\text{amb}}), \text{abs}(J45_{\text{amb}}))$ ]. The difference in J0 or J45 between the eyes is calculated as the absolute value of the difference in J0 (or J45) between the eyes, [ $J0_{\text{diff}} = \text{abs}(J0_{\text{amb}} - J0_{\text{snd}})$ ] and [ $J45_{\text{diff}} = \text{abs}(J45_{\text{amb}} - J45_{\text{snd}})$ ].

$\Delta$  = prism diopters

D = diopter

logMAR = logarithm of the minimum angle of resolution
