# Supplementary material
Source: PubMed Central journal article supplement (PMC3250558)
Supplement: NIHMS310127-supplement-03.pdf [file NIHMS310127-supplement-03.pdf]

**Table 6: Mean Acuity Improvement for Current/Previous Tropia Categories**

|                                                    | Cause of Amblyopia                                 |      |                      |      |                                                           |      |                      |      |
|----------------------------------------------------|----------------------------------------------------|------|----------------------|------|-----------------------------------------------------------|------|----------------------|------|
|                                                    | Combined Change in Amblyopic Acuity (logMAR lines) |      |                      |      | Strabismus Only Change in Amblyopic Acuity (logMAR lines) |      |                      |      |
|                                                    | Baseline to 9 Weeks                                |      | Baseline to 18 Weeks |      | Baseline to 9 Weeks                                       |      | Baseline to 18 Weeks |      |
|                                                    | n                                                  | Mean | n                    | Mean | n                                                         | Mean | n                    | Mean |
| <b>Ocular Alignment at Screening<sup>†</sup></b>   |                                                    |      |                      |      |                                                           |      |                      |      |
| Orthotropia (0 Δ)                                  | 14                                                 | 1.1  | 12                   | 2.3  | 1                                                         | 1.0  | 1                    | 3.0  |
| Microtropia (1 to 8 Δ)                             | 41                                                 | 1.8  | 40                   | 2.6  | 14                                                        | 3.0  | 14                   | 3.3  |
| Heterotropia (>8 Δ)                                | 31                                                 | 1.4  | 34                   | 2.1  | 27                                                        | 2.3  | 28                   | 3.1  |
| Adjusted P-Value*                                  | 0.55                                               |      |                      |      | 0.42                                                      |      |                      |      |
| <b>Time-Varying Current Tropia<sup>†**</sup></b>   |                                                    |      |                      |      |                                                           |      |                      |      |
| Orthotropia (0 Δ)                                  | 45                                                 | 1.7  | 44                   | 2.8  | 21                                                        | 2.8  | 24                   | 3.5  |
| Microtropia (1 to 8 Δ)                             | 31                                                 | 1.5  | 31                   | 1.9  | 12                                                        | 2.2  | 9                    | 2.3  |
| Heterotropia (>8 Δ)                                | 10                                                 | 1.0  | 11                   | 2.1  | 9                                                         | 2.1  | 10                   | 3.2  |
| Adjusted P-Value*                                  | 0.29                                               |      |                      |      | 0.56                                                      |      |                      |      |
| <b>Time-Varying Previous Tropia<sup>†***</sup></b> |                                                    |      |                      |      |                                                           |      |                      |      |
| Orthotropia (0 Δ)                                  | 22                                                 | 1.3  | 43                   | 2.6  | 11                                                        | 2.2  | 19                   | 3.5  |
| Microtropia (1 to 8 Δ)                             | 45                                                 | 1.8  | 29                   | 2.2  | 14                                                        | 2.6  | 13                   | 2.8  |
| Heterotropia (>8 Δ)                                | 19                                                 | 1.3  | 10                   | 1.6  | 17                                                        | 2.5  | 8                    | 3.3  |
| Adjusted P-Value*                                  | 0.35                                               |      |                      |      | 0.04                                                      |      |                      |      |

<sup>†</sup>For this analysis ocular alignment was classified using the smallest angle of the distance and near deviation measured by Simultaneous Prism and Cover Test.

\*From a longitudinal linear regression of visual acuity at 9 and 18 weeks adjusting for: ocular alignment at baseline, baseline amblyopic eye visual acuity, amblyopic eye spherical equivalent, maximum of the vertical (J0) or oblique (J45) Jackson cross cylinder, age at baseline, vector dioptric difference and stereoacuity at baseline. All factors are continuous (except baseline stereoacuity and scored ocular alignment (at screening, baseline, current visit and previous visit).

\*\*Angle of deviation at the current visit (i.e. angle of deviation at 9 weeks for change in visual acuity at 9 weeks and angle of deviation at 18 weeks for change in visual acuity at 18 weeks).

\*\*\*Angle of deviation at the prior visit (i.e. angle of deviation at baseline for change in visual acuity at 9 weeks and angle of deviation at 9 weeks for change in visual acuity at 18 weeks).

Δ = prism diopters

D = diopter

logMAR = logarithm of the minimum angle of resolution
