# Supplementary material
Source: PubMed Central journal article supplement (PMC3250558)
Supplement: NIHMS310127-supplement-05.pdf [file NIHMS310127-supplement-05.pdf]

**Figure 4A: Visit with Best Amblyopic Eye Visual Acuity in Combined-Mechanism Group\***

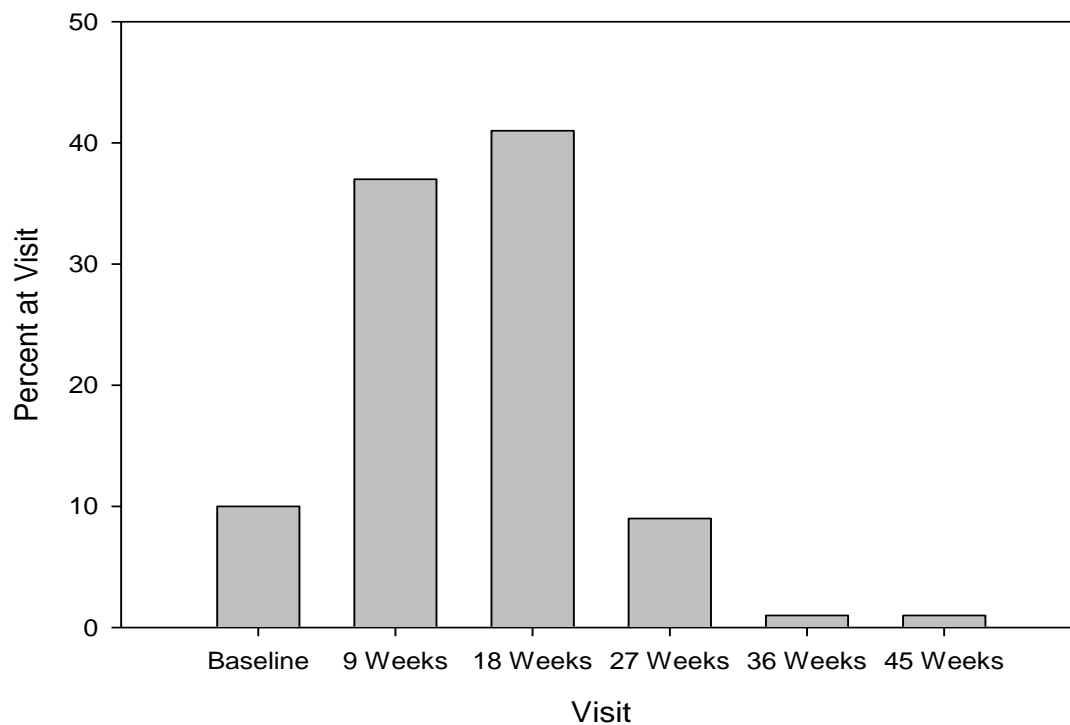

**Figure 4B: Visit with Best Amblyopic Eye Visual Acuity in Strabismus-Only Group\***

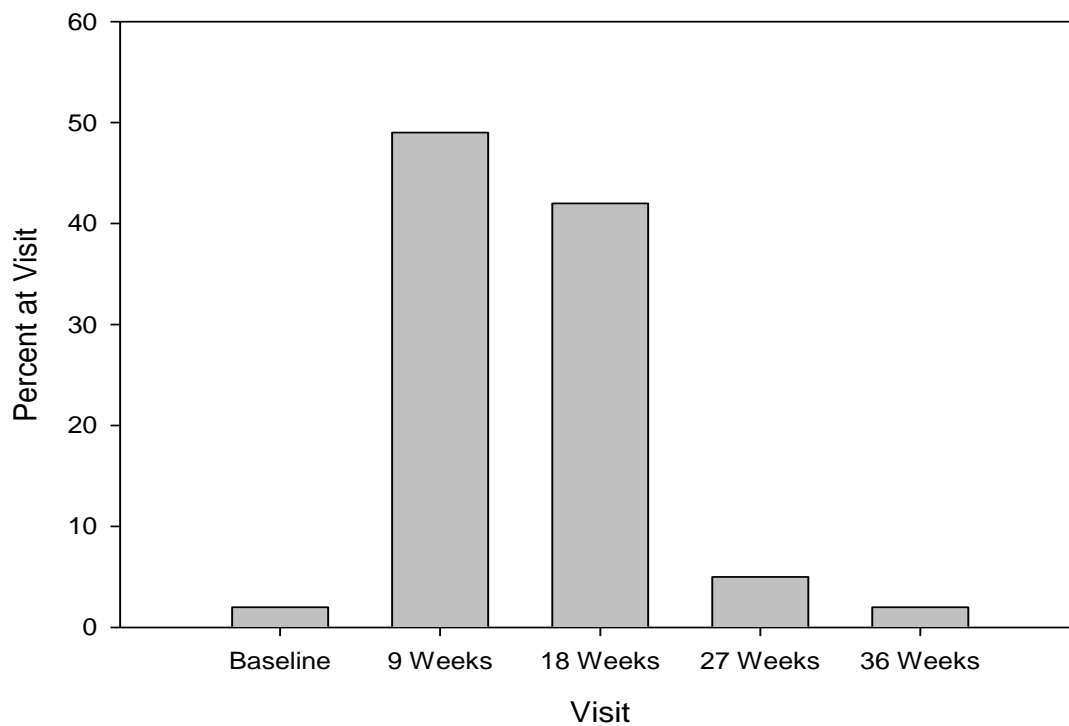

**Figure Legend:** \*Includes those who completed the 18-week visit (Fig 4A N=86; Fig 4B N=43). Participation past the 18-week visit was discontinued if the better of the corrected amblyopic eye visual acuity with and without a -1.00 diopter lens over the spectacles was not at least 1 line better than the visual acuity from the previous study visit.
