# Supplementary material
Source: PubMed Central journal article supplement (PMC3250558)
Supplement: NIHMS310127-supplement-06.pdf [file NIHMS310127-supplement-06.pdf]

## Appendix 1

**Writing Committee: (Lead Authors)** Susan A. Cotter, OD, MS<sup>1</sup>; Nicole C. Foster, MS<sup>2</sup>; Jonathan M. Holmes, BM, BCh<sup>3</sup>; B. Michele Melia, ScM<sup>2</sup>; **Additional Authors:** David K. Wallace, MD MPH<sup>4</sup>; Michael X. Repka, MD<sup>5</sup>; Susanna M. Tamkins, OD<sup>6</sup>; Raymond T. Kraker, MSPH<sup>2</sup>; Roy W. Beck, MD, PhD<sup>2</sup>; Darren L. Hoover, MD<sup>7</sup>; Eric R. Crouch III, MD<sup>8</sup>; Aaron M. Miller, MD<sup>9</sup>; Christie L. Morse, MD<sup>10</sup>; Donny W. Suh, MD<sup>11</sup>

From the <sup>1</sup>Southern California College of Optometry, Fullerton, California; <sup>2</sup>Jaeb Center for Health Research, Tampa, Florida; <sup>3</sup>Department of Ophthalmology, Mayo Clinic, Rochester, Minnesota; <sup>4</sup>Duke Eye Center, Durham, North Carolina; <sup>5</sup>Johns Hopkins University School of Medicine, Baltimore, Maryland; <sup>6</sup>Bascom Palmer Eye Institute, Miami, Florida; <sup>7</sup>Everett and Hurite Ophthalmic Association, Cranberry Township, Pennsylvania; <sup>8</sup>Eastern Virginia Medical School Norfolk, Virginia; <sup>9</sup>Houston Eye Associates, Texas; <sup>10</sup>Concord Eye Care P.C., Concord NH; <sup>11</sup>Wolfe Clinic, West Des Moines, IA

### **The Pediatric Eye Disease Investigator Group:**

#### **Clinical Sites that Participated in this Protocol**

Sites are listed in order by number of subjects screened and number of subjects included in analysis (number screened / number analyzed). Personnel are listed as (I) for Investigator, (C) for Coordinator, and (E) for Visual Acuity Examiner.

\*Center received support utilized for this project from an unrestricted grant from Research to Prevent Blindness Inc., New York, New York.

\*\* Center received support utilized for this project from the UK National Institute for Health Research, through the Northumberland, Tyne and Wear Comprehensive Local Research Network

**Cranberry TWP PA - Everett and Hurite Ophthalmic Association (31 / 30)**

Darren L. Hoover, (I); Pamela A. Huston, (C); Christine Deifel, (E); Pamela M. Racan, (E);  
Jasbir K. Sayal, (E); Kari Soros, (E)

**Concord NH - Concord Eye Care P.C. (19 / 18)**

Christie L. Morse, (I); Maynard B. Wheeler, (I); Melanie L. Christian, (C); Caroline C. Fang,  
(C); Gregory L. Whitman, (C); Linda E. Smith, (E)

**Norfolk VA - Eastern Virginia Medical School (15 / 14)**

Earl R. Crouch, Jr., (I); Earl R. Crouch III, (I); Gaylord G. Ventura, (C)

**Erie PA - Pediatric Ophthalmology of Erie (15 / 12)**

Nicholas A. Sala, (I); Rhonda M. Hodde, (C); Veda L. Zeto, (C)

**Lancaster PA - Family Eye Group (10 / 10)**

David I. Silbert, (I); Noelle S. Matta, (C); Darlene R. Crick, (E)

**West Des Moines IA - Wolfe Clinic (15 / 9)**

Donny W. Suh, (I); Amy J. Dix, (C); Marilee McNeece, (C); Autumn Parrino, (C); Rhonda J.  
Countryman, (E); Lisa M. Fergus, (E); Susan K. Hayes, (E)

**Miami FL - Bascom Palmer Eye Institute (12 / 9)**

Susanna M. Tamkins, (I); Eva M. Olivares, (C); Marlon Parra, (C)

**Columbus OH - Pediatric Ophthalmology Associates, Inc. (9 / 5)**

Don L. Bremer, (I); Richard P. Golden, (I); David L. Rogers, (I); Rae R. Fellows, (C); Teresa M. Rinehart, (C); Amy J. Wagner, (C); Rich E. Cox, (E); Rebecca A. Murray, (E); Laura J. Shenberger, (E); Meghan C. Tice, (E); Angela R. Young, (E)

**Birmingham AL - University of Alabama at Birmingham School of Optometry (5 / 5)**

Robert P. Rutstein, (I); Katherine K. Weise, (I); Cathy H. Baldwin, (C); Michael P. Hill, (C); Blake T. Samper, (C)

**Durham NC - Duke University Eye Center (4 / 3)**

Laura B. Enyedi, (I); David K. Wallace, (I); Sarah K. Jones, (C); Courtney E. Fuller, (E)

**Rockville MD - Stephen R. Glaser, M.D., P.C. (3 / 3)**

Stephen R. Glaser, (I); Christen Y. Addison, (C); Tracey L. Coussens, (C); Noga Senderowitsch, (C)

**Newcastle upon Tyne - Newcastle upon Tyne Hospitals NHS Trust (5 / 2)\*\***

Michael P. Clarke, (I); Sarah J. Bryant, (C); Christine J. Powell, (C); Kate Shotton, (E)

**Minneapolis MN - University of Minnesota (4 / 2)\***

C. Gail Summers, (I); Ann M. Holleschau, (C); Anna I. de Melo, (E); Kathy M. Hogue, (E); Kim S. Merrill, (E)

**Lisle IL - Progressive Eye Care (3 / 2)**

Patricia L. Davis, (I); Katie R. Hulett, (C); Indre M. Rudaitis, (C)

**Tomball TX - Houston Eye Associates (3 / 2)**

Aaron M. Miller, (I); Jorie L. Jackson, (C)

**Boise ID - Intermountain Eye Center (2 / 2)**

Katherine A. Lee, (I); Bonita R. Schweinler, (C); Larry W. Plum, (E)

**Waterbury CT - Eye Care Group, PC (2 / 2)**

Andrew J. Levada, (I); Cheryl Capobianco, (C); Tabitha L. Walker, (C)

**South Charleston WV - Children's Eye Care & Adult Strabismus Sugery (3 / 1)**

Deborah L. Klimek, (I); Bounthavy Lisa Greenlee, (C); Lisa L. Winter, (C)

**Wilmette IL - Pediatric Eye Associates (3 / 1)**

Deborah R. Fishman, (I); Lisa C. Verderber, (I); JoAnn Spieker, (C)

**Cleveland OH - Cole Eye Institute (2 / 1)\***

Paul J. Rychwalski, (I); Elias Traboulsi, (I); Susan W. Crowe, (C)

**Fullerton CA - Southern California College of Optometry (2 / 1)**

Susan A. Cotter, (I); Raymond H. Chu, (I); Lisa M. Edwards, (I); Maedi M. Bartolacci, (C); Sue M. Parker, (C)

**Houston TX - University of Houston College of Optometry (2 / 1)**

Karen D. Fern, (I); Ruth E. Manny, (I); Gabynely G. Solis, (C)

**Saint Paul MN - Associated Eye Care (2 / 1)**

Susan Schloff, (I); E. Denise Daffron, (C); Valori E. Host, (C); Rebecca A. Wolf, (C)

**Buffalo NY - Ross Eye Institute, Univ at Buffalo, Dept of Ophthalmology (1 / 1)**

Airaj F. Fasiuddin, (I); Blair Spencer, (C)

**Calgary - Alberta Children's Hospital (1 / 1)**

William F. Astle, (I); Linda L. Cooper, (I); Kenneth G. Romanchuk, (I); Ania M. Hebert, (C);

Stacy Ruddell, (C); Heather N. Sandusky, (C); Christine M. Berscheid, (E)

**Fall River MA - Center for Eye Health Truesdale Clinic (1 / 1)**

John P. Donahue, (I); Mary E. Silvia, (C); Deborah P. Branco, (E)

**Grand Rapids MI - Pediatric Ophthalmology, P.C. (1 / 1)**

Patrick J. Droste, (I); Robert J. Peters, (I); Jan Hilbrands, (C)

**Memphis TN - Southern College of Optometry (1 / 1)**

Janette D. Dumas, (I); Jonathan D. Reddell, (C)

**Milwaukee WI - Medical College of Wisconsin (1 / 1)\***

Jane D. Kivlin, (I); Mark S. Ruttum, (I); Veronica R. Picard, (C); Margaret L. Willett, (E)

**Portland OR - Casey Eye Institute (1 / 1)**

Daniel J. Karr, (I); Leah G. Reznick, (I); Allison I. Summers, (I); Kimberley A. Beaudet, (C);  
Yelena M. Bubnov, (E)

**Portland OR - Pacific University College of Optometry (1 / 1)**

Richard London, (I); James J. Kundart, (I); Jayne L. Silver, (C)

**Schaumburg IL - Advanced Vision Center (1 / 1)**

Ingryd J. Lorenzana, (I); Yesenia Meza, (C); Efigenia Ojeda, (C)

**Sharon MA - Daniel M. Laby, M.D. (1 / 1)**

Daniel M. Laby, (I); Ricky Laby, (C) Beth G. Harper, (E)

**Arnold MD - Ophthalmology Associates of Greater Annapolis (2 / 0)**

John M. Avallone, (I); Charlene R. Bryant, (C)

**Willoughby OH - Ophthalmology Consultants, Inc. (1 / 0)**

Bernard D. Perla, (I); Christine A. Hochrein, (C)

**PEDIG Coordinating Center:**

Raymond T. Kraker, Roy W. Beck, Christina M. Cagnina-Morales, Debora A. Cagnina, Danielle  
L. Chandler, Laura E. Clark, Chelsea Costa, Elise R. Diamond, Quayleen Donahue, Brooke P.  
Fimbel, Nicole C. Foster, Megan R. Gumke, Brett M. Kaminski, Elizabeth L. Lazar, Stephanie  
V. Lee, Lee Anne Lester, B. Michele Melia, Pamela S. Moke, Michael Philips, Diana E. Rojas

**National Eye Institute – Bethesda, MD:**

Donald F. Everett

**Amblyopia Treatment Study Steering Committee:**

Eileen E. Birch, Susan A. Cotter, Donald F. Everett, Rae R. Fellows, Jonathan M. Holmes,

Raymond T. Kraker, Elizabeth L. Lazar, Michael X. Repka, David K. Wallace

**PEDIG Executive Committee**

Jonathan M. Holmes (chair), Darron A. Bacal (2009), Roy W. Beck, Eileen E. Birch, Stephen P.

Christiansen, Susan A. Cotter, Donald F. Everett, Darron L. Hoover (2008), Pamela A. Huston

(2009), Raymond T. Kraker, Katherine A. Lee, Noelle S. Matta, David G. Morrison, Michael X.

Repka, Robert P. Rutstein (2009), Mitch M. Scheiman (2008), David K. Wallace (2009)

**PEDIG Data and Safety Monitoring Committee:**

Marie Diener-West (Chair), John Baker, Barry Davis, Velma Dobson, Donald Everett, Stephen Poff, Dale

Phelps, Richard Saunders, Lawrence Tychsen
